# Supplementary material for: Delivery of Bioactive Gene Particles via Gelatin-Collagen-PEG-Based Electrospun Matrices
Source: MDPI journal article supplement (doi:10.3390/ph14070666), 2021-07-12
Supplement: s1 [file s1]

Supplementary Information

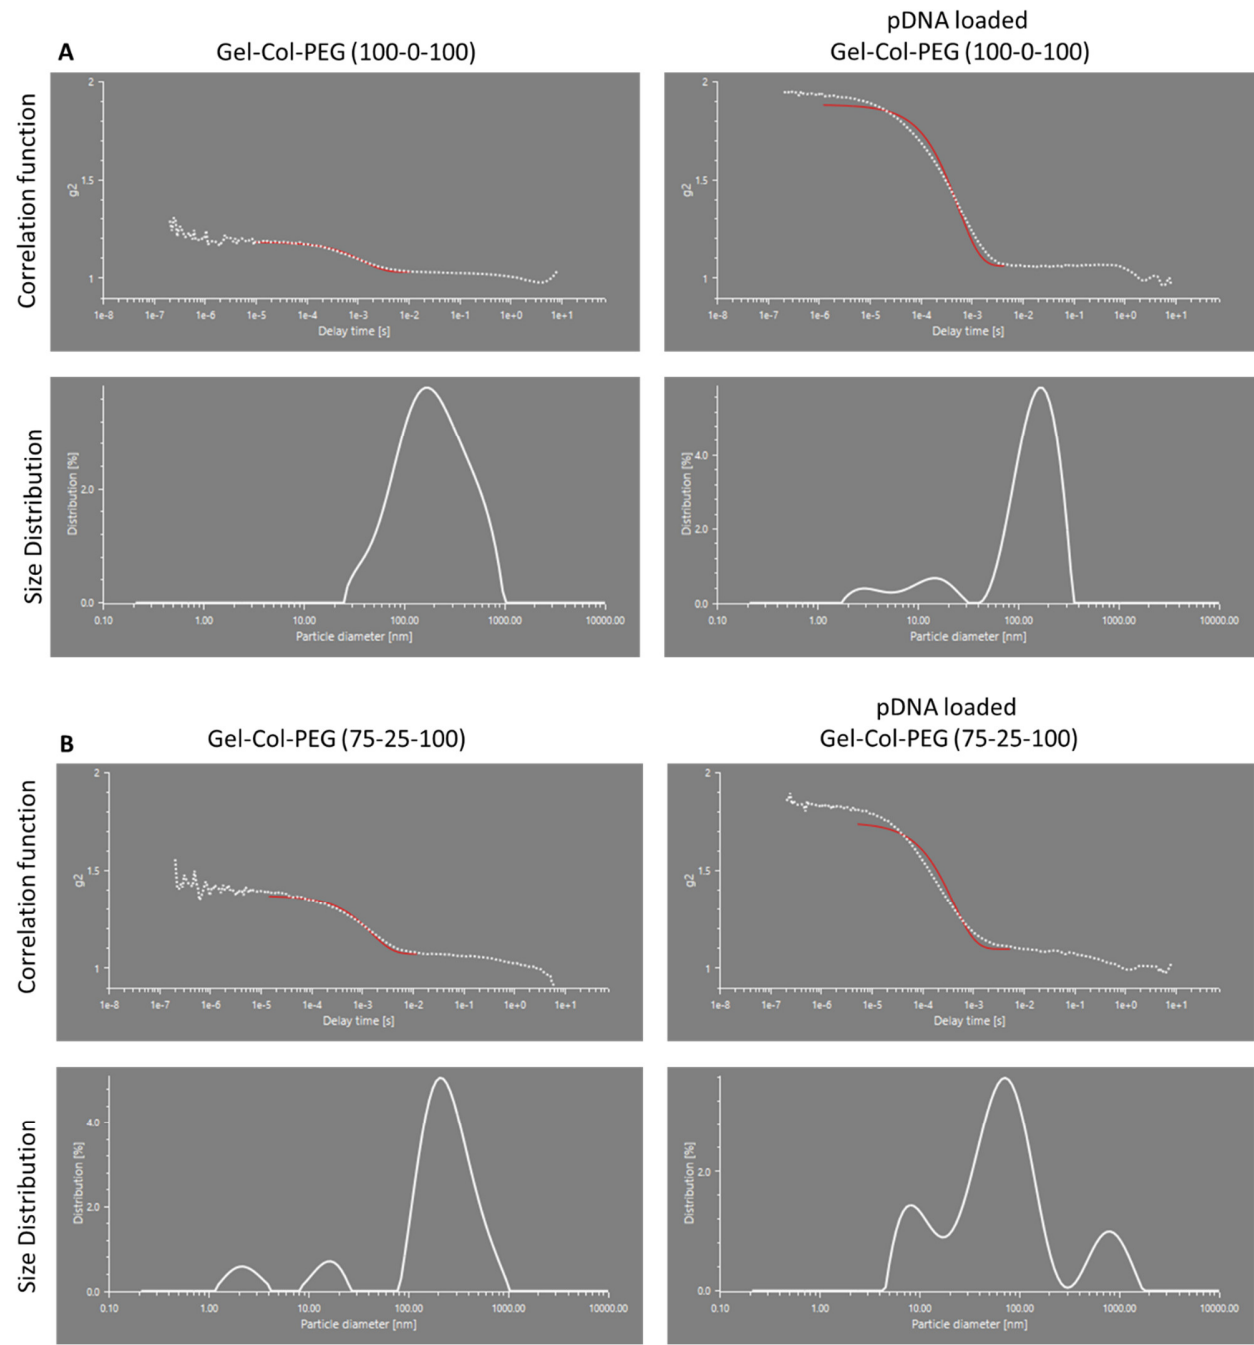

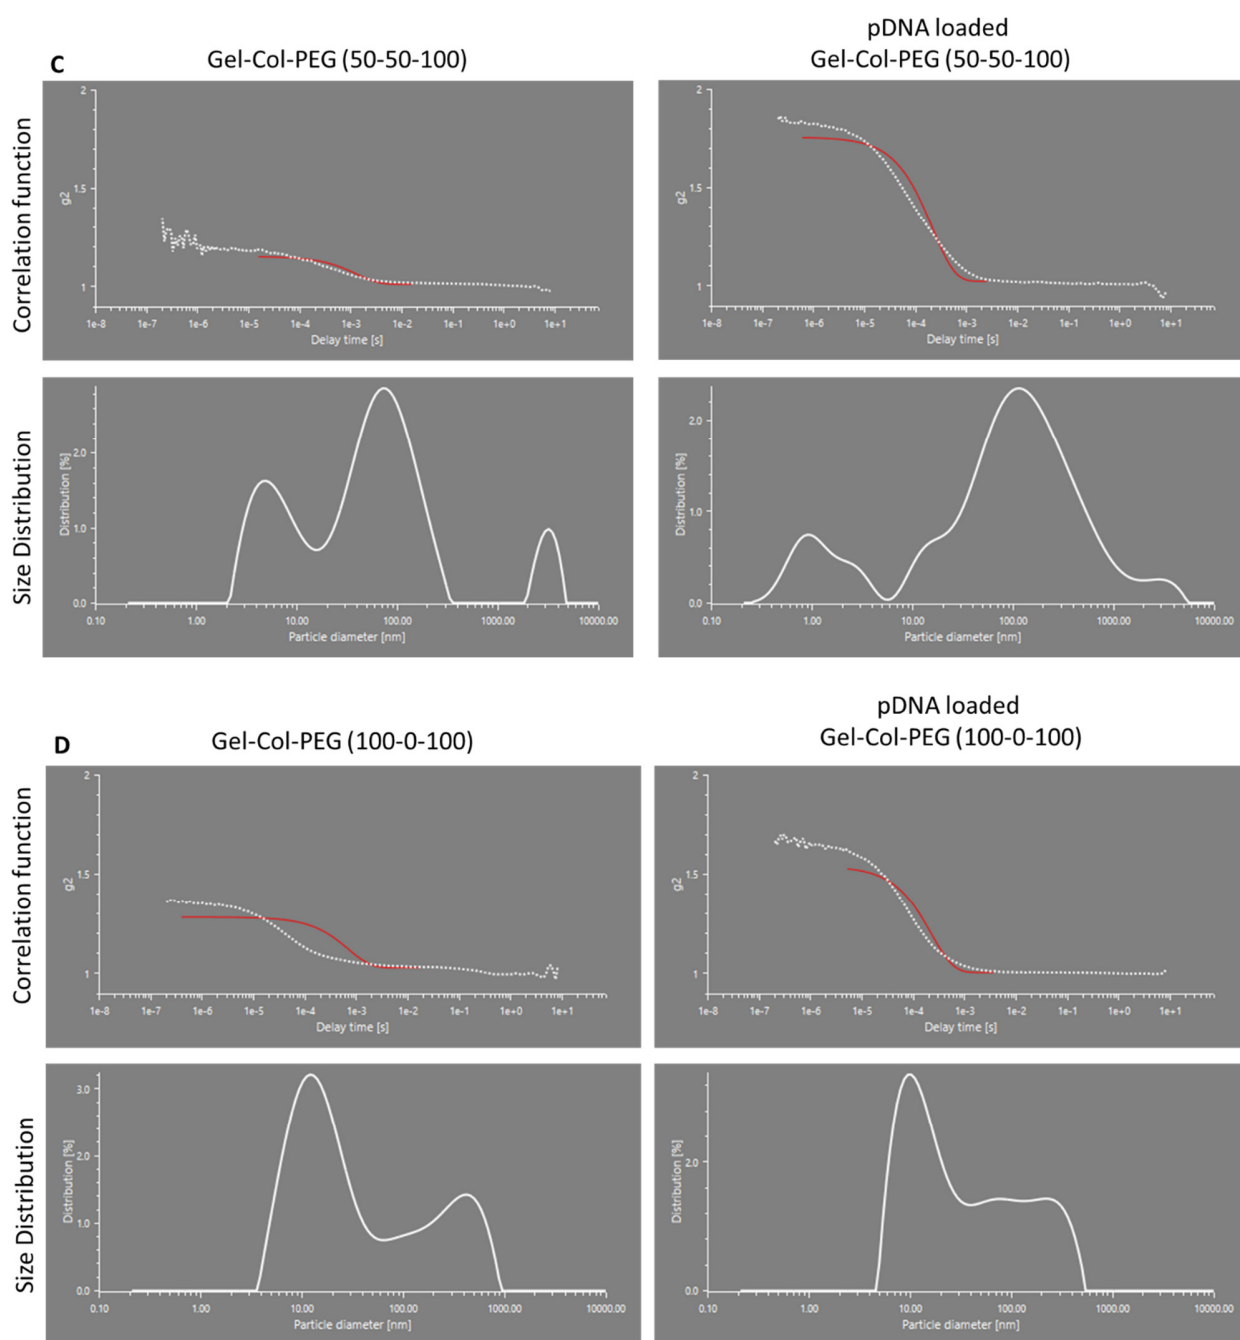

**Figure S1.** Correlation function and size distribution of particles released from different volume ratio Gel-Col-PEG mats (A-D) in comparison to mats without particles.

0 min of incubation with  
trypsin

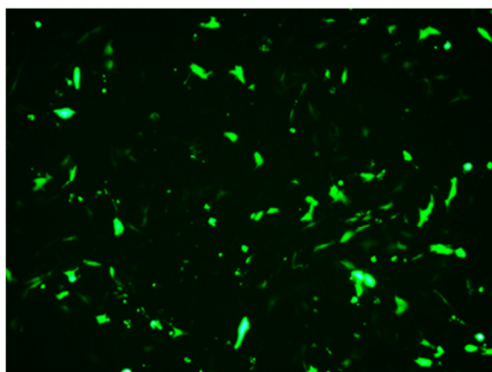

10 min of incubation with  
trypsin

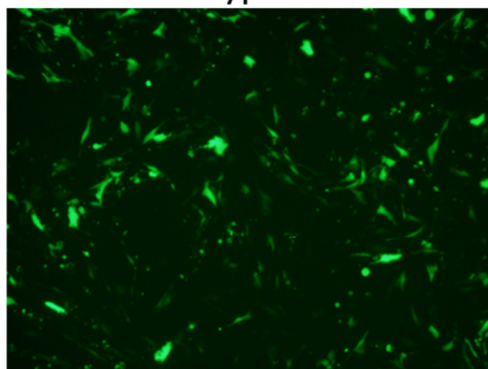

20 min of incubation with  
trypsin

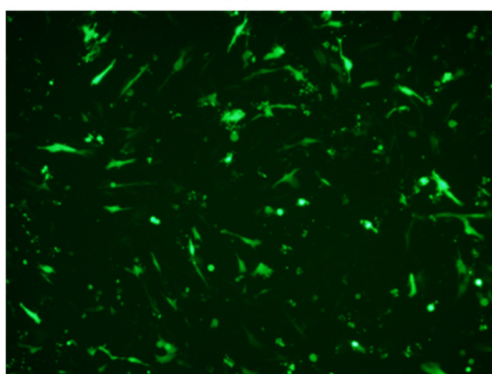

30 min of incubation with  
trypsin

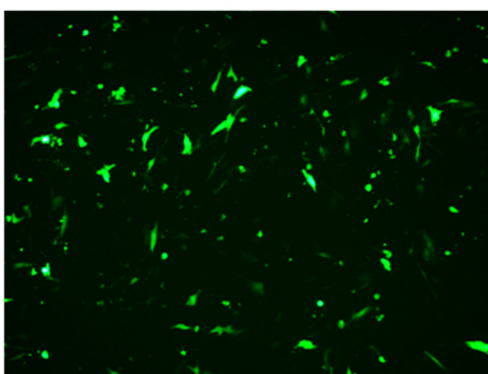

**Figure S2.** The complexes were incubated in trypsin for only 5 min to dissolve the mats prior to any further testing. For assessment here, up to 30 min incubation with trypsin is used to ensure full exposure of the complexes.
